# Supplementary material for: Targeted gene addition to a predetermined site in the human genome using a ZFN-based nicking enzyme
Source: HighWire-hosted journal article supplement (doi:10.1101/gr.122879.111), 2012-03-20
Supplement: SuppWang122879.docx [file SuppWang122879.docx]

**Supplementary Tables**

**Table S1. Representative NHEJ events detected by Illumina ultra deep sequencing from WT/WT ZFN treated cells.**

| **Sequences** | **Type** | **Size (bp)** |
| --- | --- | --- |
| GCTGGTCATCCTCATCCTGATAAACTGCAAAAGGCTGAAGAGCATGACTGACATC | reference |  |
| GCTGGTCATCCTCATCCTGATAAACTGCAAAAGGCT | wild-type |  |
| GCTGGTC:::::::::CTGATAAACTGCAAAAGGCTGAAGAGCAT | deletion | 9 |
| GCTGGTCA::::::::CTGATAAACTGCAAAAGGCTGAAGAGCA | deletion | 8 |
| GCTGGTCA::::::::::::::AACTGCAAAAGGCTGAAGAGCATGACTG | deletion | 14 |
| GCTGGTCATCC:::::CTGATAAACTGCAAAAGGCTGAAGA | deletion | 5 |
| GCTGGTCATCCT::::::GATAAACTGCAAAAGGCTGAAGAG | deletion | 6 |
| GCTGGTCATCCT::::::::::::::GCAAAAGGCTGAAGAGCATGACTG | deletion | 14 |
| GCTGGTCATCCTCA::CTGATAAACTGCAAAAGGCTGA | deletion | 2 |
| GCTGGTCATCCTCA::::::::AACTGCAAAAGGCTGAAGAGCA | deletion | 8 |
| GCTGGTCATCCTCA:::::::::ACTGCAAAAGGCTGAAGAGCAT | deletion | 9 |
| GCTGGTCATCCTCA:::::::::::::::AAAGGCTGAAGAGCATGACTGA | deletion | 15 |
| GCTGGTCATCCTCATC::GATAAACTGCAAAAGGCTGA | deletion | 2 |
| GCTGGTCATCCTCATC:::ATAAACTGCAAAAGGCTGAA | deletion | 3 |
| GCTGGTCATCCTCATC::::TAAACTGCAAAAGGCTGAAG | deletion | 4 |
| GCTGGTCATCCTCATC:::::AAACTGCAAAAGGCTGAAGA | deletion | 5 |
| GCTGGTCATCCTCATC:::::::::TGCAAAAGGCTGAAGAGCAT | deletion | 9 |
| GCTGGTCATCCTCATC::::::::::::AAAAGGCTGAAGAGCATGAC | deletion | 12 |
| GCTGGTCATCCTCATCCT:::AAACTGCAAAAGGCTGAA | deletion | 3 |
| GCTGGTCATCCTCATCCTG::::::::CAAAAGGCTGAAGAGCA | deletion | 8 |
| GCTGGTCATCCTCATCCTGA::AACTGCAAAAGGCTGA | deletion | 2 |
| GCTGGTCATCCTCATCCTGA::::::::::::::::::AGAGCATGACTGACAT | deletion | 18 |
| GCTGGTCATCCTCATCCTGAT::::::CAAAAGGCTGAAGAG | deletion | 6 |
| GCTGGTCATCCTCATCCTGATA::CTGCAAAAGGCTGA | deletion | 2 |
| GCTGGTCATCCTCATCCTGATAAA:::::::AGGCTGAAGAGC | deletion | 7 |
| GCTGGTCATCCTCATCCTGATAAA::::::::GGCTGAAGAGCA | deletion | 8 |
| GCTGGTCATCCTCATCCT**ct**GATAAACTGCAAAAGG | insertion | 2 |
| GCTGGTCATCCTCATCCTG**ctg**ATAAACTGCAAAAG | insertion | 3 |
| GCTGGTCATCCTCATCCTGAT**at**AAACTGCAAAAGG | insertion | 2 |
| GCTGGTCATCCTCATCCTGAT**gat**AAACTGCAAAAG | insertion | 3 |
| GCTGGTCATCCTCATCCTGAT**tgat**AAACTGCAAAA | insertion | 4 |
| GCTGGTCATCCTCATCCTGAT**ctgat**AAACTGCAAA | insertion | 5 |

Representative high quality sequence reads (>99% confidence for each base) obtained by Illumina deep sequencing of the ZFN/ZFNickase target site in the *CCR5* locus using genomic DNA obtained from K562 cells treated with CCR5-patch donor and WT/WT ZFNs (ZFN-L-EL + ZFN-R-KK). Missing bases (deletions) are indicated by “:”, whereas inserted bases (insertions) are indicated by non-capitalized letters. The type of mutation (insertion or deletion) and its size (bp) are indicated in the second and third columns, respectively.

**Table S2. Sequences of adapters used to prepare samples for Illumina deep sequencing.**

| **Name** | **Sequence** |
| --- | --- |
| Bpm strand1-no tag | 5’ ACACTCTTTCCCTACACGACGCTCTTCCGATCTG 3’ |
| Bpm strand2-no tag | 5’ P-GATCGGAAGAGCGTCGTGTAGGGAAAGAGTGT 3’ |
| Bpm-strand1-AAT | 5’ ACACTCTTTCCCTACACGACGCTCTTCCGATCTAATG 3’ |
| Bpm-strand2-AAT | 5’ P-TTAGATCGGAAGAGCGTCGTGTAGGGAAAGAGTGT 3’ |
| Bpm strand1-CCT | 5’ ACACTCTTTCCCTACACGACGCTCTTCCGATCTCCTG 3’ |
| Bpm strand2-CCT | 5’ P-GGAGATCGGAAGAGCGTCGTGTAGGGAAAGAGTGT 3’ |
| Bpm-strand1-GGT | 5’ ACACTCTTTCCCTACACGACGCTCTTCCGATCTGGTG 3’ |
| Bpm-strand2-GGT | 5’ P-CCAGATCGGAAGAGCGTCGTGTAGGGAAAGAGTGT 3’ |
| Xho-strand1 | 5’ P-TCGAGAGATCGGAAGAGCTCGTATGCCGTCTTCTGCTTG 3’ |
| Xho-strand2 | 5’ CAAGCAGAAGACGGCATACGAGCTCTTCCGATCTC 3’ |

The adapters were prepared by annealing strand1 and corresponding strand2 oligos. One of the Bpm adapters was used together with the XhoI adapter for the adapter ligation reactions to prepare samples for Illumina deep sequencing as described (see **Methods)**.

**Table S3. Evaluation of ZFNickase-induced DNA modification at the AAVS1 locus by Illumina deep sequencing.**

| ZFN-L/R | Total Seq | TI% | gcca_  Ins% | und_Ins  % | Del  % | TI/  all_Indel | TI /  und_Indel |
| --- | --- | --- | --- | --- | --- | --- | --- |
| WT/WT | 3797693 | 17.2578 | 12.5954 | 2.8541 | 13.1106 | 0.60 | 1.08 |
| None/none | 3051806 | 0.0033 | 0.0004 | 0.0216 | 0.0012 |  |  |
| D450N/WT | 3003047 | 0.7974 | 0.2602 | 0.0704 | 0.0113 | 2.33 | 9.76 |

K562 cells were transfected with the AAVS1-HindIII donor DNA (see **FigS5B** legend) with or without the indicated ZFN combinations. Cells transfected with the donor only and donor plus D450N/WT ZFNickases were transfected repeatedly with the same DNA combination every week for four weeks. Cells were collected to prepare genomic DNA 5 days later after the last transfection for Illumina deep sequencing. Only high quality sequence reads (>99% confidence for each base) were included in the analysis to classify sequences as wild-type (WT), insertions (Ins), deletions (Del) or targeted integration (TI). Unexpectedly, sequences containing a defined “GCCA” duplication of the sequence between the ZFN-binding sites (underlined, ACCCCACAGTGGGGCCAGCCACTAGGGACAGGAT, gcca_Ins) represented an unusually high proportion of the total insertions (82%) and of the total indels (44%) in the WT/WT ZFN-treated sample. Due to the abundance of this specific mutation, its potential creation via a different DNA repair pathway (Kvikstad et al. 2007; Russell and Hirata 2008), and thus the potential to skew the data we calculated the TI-to-indel ratio both with (TI/all_Indel) or without (TI/und_Indel) the inclusion of the GCCA-duplications. All_Indel is the sum of all insertions and deletions. Und_Indel is the sum of all undefined insertions (excludes the “GCCA” duplication events) and deletions. The sequences from the control cells (no ZFN-treated) were used to establish the background level of mutations in the assay.**Supplementary Figures**

**Supplementary Figure 1.**

**GFP reporter**


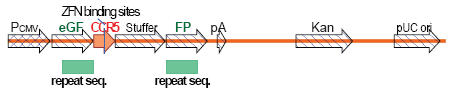


**Figure S1. A schematic representation of the reporter used for the mammalian homologous repeat deletion studies.** Two fragments of the eGFP open reading frame possessing 430bp of repeated overlapping sequence were interrupted by the insertion of a 300bp fragment of the *CCR5* gene containing the *CCR5* ZFN binding sites and a 700bp stuffer fragment. The 430bp of eGFP overlap serve to direct DNA repair via excision of the intervening DNA sequence thus restoring the eGFP coding sequence. The repaired eGFP gene can then direct expression of functional eGFP protein under the CMV promoter, which can be detected and quantified by flow cytometry analysis.

**Supplementary Figure 2.**


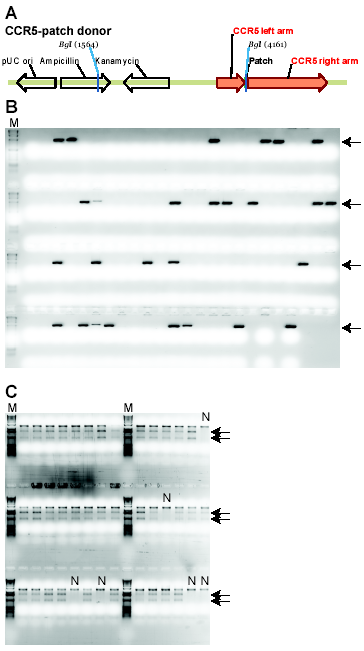


**Figure S2. Analysis of single-cell derived clones following nick-induced targeted integration at the *CCR5* locus.** (**A**) Schematic representation of the CCR5-patch donor DNA used in this study. The donor DNA is constructed using pCR4-TOPO (Invitrogen) as the vector backbone. The *CCR5* left arm and right arm indicate sequences derived from the genomic sequence of the *CCR5* locus flanking the *CCR5* ZFN binding sites. The left arm is 476 bp long, the right arm is 1428 bp long. DNA sequence at the junction is as follows: acatgctggtcatcctcatcTAGATCAGTGAGTATGCC**CTGAT**GGCGTCTGGACTGGATGCCTCGTCTAGAaaactgcaaaaggctgaaga. The patch (upper case letters) is a 51bp insertion including the original 5bp spacing (bold upper case letters) between the *CCR5* ZFN binding sites (underlined lower case letters). The *Bgl* I restriction enzyme site is indicated in underlined upper case letters. (**B**) Representative data of “In-out” PCR screening of single cell-derived clones following targeted integration of the RFLP-containing patch at the *CCR5* locus. Genomic DNA was isolated from each single-cell derived line using QuickExtract DNA Extraction solution (Epicentre Biotechnologies), the *CCR5* locus was PCR amplified using a *CCR5* primer (5’-CTGCCTCATAAGGTTGCCCTAAG-3’) located outside the *CCR5* homologous region of the CCR5-patch donor and another primer (5’-ACGCCATCAGGGCATAC-3’) within the patch region, and then the PCR products were resolved on a 1% agarose gel. The presence of a PCR band at the expected size (1017bp) indicates a targeted integration event. “M” denotes the gel lane loaded with the DNA ladder. Arrows indicate the expected positions of the amplified PCR products. (**C**) Representative data from the *CCR5* RFLP assay to confirm the targeted insertion of the donor-encoded *Bgl* I patch sequence in the single cell-derived clones. Genomic DNA from selected clones based on the “In-Out” PCR reactions in panel **B** were PCR amplified, digested with *Bgl* I, and then resolved on a 1% agarose gel as described (see **Methods**). The top band represents uncut WT *CCR5*, and the lower two *Bgl* I cleaved bands (indicated by arrows) represent the *CCR5* alleles modified by HDR and have had the patch sequence inserted between the 2 *CCR5* ZFN binding sites. “N” indicates a negative clone, whereas all other lanes are positive clones that have the patch sequence inserted into the *CCR5* locus.

**Supplementary Figure 3.**

**A. CCR5-GFP donor**


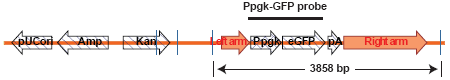


**B. WT *CCR5* locus**


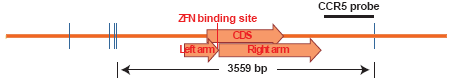


**C. *CCR5* locus with targeted integration**


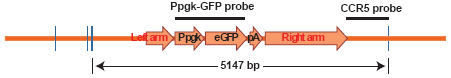


**D. WT *PGK* locus**


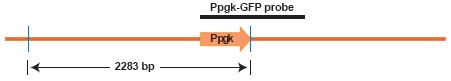


**E.**


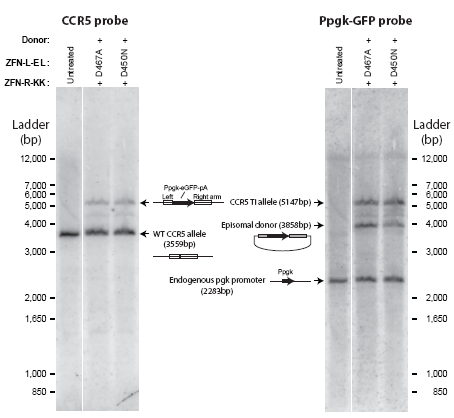


**Figure S3. Southern blot analysis confirms nick induced homology-directed gene insertion** (**A**) A schematic representation of the CCR5-GFP donor DNA construct. The donor DNA is constructed using pCR4-TOPO (Invitrogen) as the vector backbone. The left and right arms (homologous sequences) indicate sequences derived from the *CCR5* genomic locus flanking the *CCR5* ZFN binding sites as described in **Fig. S2** except that a 1593 bp eGFP expression cassette (a pgk promoter, an eGFP open reading frame, and a BGH polyA sequence) is inserted between the two *CCR5* homologous arms instead of the 51 bp patch. Episomal persistence of the CCR5-GFP plasmid donor can be visualized as a 3585 bp fragment after PvuII digestion (restriction enzyme sites are indicated by crossed blue lines) when detected by a Ppgk-GFP probe. (**B**) The wild-type endogenous *CCR5* locus. A 3559 bp fragment after PvuII digestion can be detected by a *CCR5* probe (located outside of the right homologous arm) as indicated. (**C**) The *CCR5* locus with targeted integration of the Ppgk-eGFP-pA sequence. A 5147 bp *PvuII*-digested fragment of the *CCR5* locus with targeted integration can be detected by either the Ppgk-eGFP or *CCR5* probe as indicated. (**D**) The *PGK* locus. A 2283 bp *PvuII*-digested fragment of the *PGK* locus containing the *PGK* promoter region can be detected by the Ppgk-GFP probe. (**E**) Southern blot analysis of sorted GFP+ cell pools. K562 cells were transfected with the indicated ZFN variants in the presence of the CCR5-GFP donor DNA. GFP+ cells were then sorted 4 weeks post-transfection and expanded to obtain genomic DNA (gDNA) for Southern blot. Brifely, 20-25 g of gDNAs were digested with *PvuII* overnight and purified by phenol/chloroform extraction. The digested gDNAs were then resolved on 0.8% agarose gel and transferred to a Nytran Super Charge membrane (Schleicher and Schuell) and hybridized with 32P-labeled Ppgk-GFP (right panel) or *CCR5* (left panel, re-hybridized after stripping) probes. The membrane was exposed and scanned using a phosphorimager system (Molecular Dynamics).

**Supplementary Figure 4**

**Figure S4. Genome-wide evaluation of DSB formation in ZFN-treated cells by H2AFX staining.** K562 cells were transfected with CCR5-patch donor in the absence (No ZFN) or presence of the indicated ZFNs or ZFNickases: ZFN-L-EL + ZFN-R-KK (WT/WT), ZFN-L-EL-D450N + ZFN-R-KK (D450N/WT), ZFN-L-EL-D467A + ZFN-R-KK (D467A/WT). Cells were collected at the indicated times post-transfection and subjected to anti-H2AFX staining and flow cytometry analysis as described (see **Methods)**. The percentage (%) of H2AFX+ cells is indicated in the upper left corner of each overlay histogram. The same marker was set empirically in all single histograms so that untreated cells stained with anti-H2AFX antibody have ~1% background. The percentage (%) of H2AFX+ cells was calculated by subtracting background (% H2AFX+ cells from the untreated sample) from % H2AFX+ cells in the ZFN/ZFNickase-treated cells.

**Supplementary Figure 5.**


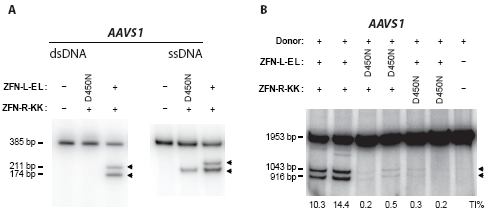


**Figure S5. ZFNickases targeting the *AAVS1* site generate single-strand breaks and stimulate HDR driven gene insertion.** (**A**) *In vitro* assessment of nicking activity of the D450N/WT ZFN variants targeting the *PPP1R12C* gene (also known as the *AAVS1* locus). The *AAVS1* ZFNs have been described previously (Hockemeyer et al. 2009). A 385 bp fragment of *AAVS1* containing the ZFN binding sites was PCR amplified from K562 genomic DNA. The purified PCR products were subjected to *in vitro* cleavage assay and resolved under non-denaturing (dsDNA, left panel) or denaturing (ssDNA, right panel) conditions (as in **Fig.1)**. The expected sizes of the cleaved products by *AAVS1* ZFNs are 211 bp and 174 bp (indicated by arrows). (**B**) ZFNickases targeting the AAVS1 site drive targeted gene addition by HDR. K562 cells were transfected with the indicated *AAVS1* ZFN variants and a RFLP donor plasmid, in which, the 6 bp GGCCAC was replaced with a 12 bp sequence (GGCAAGCTTTAC) to introduce a unique *HindIII* site (underlined) between the *AAVS1* ZFN binding sites (underlined, ACCCCACAGTGGGGCCACTAGGGACAGGAT) flanked with the left (801 bp) and right (835 bp) homologous arms. Genomic DNA was collected 3 days post-transfection and subjected to a RFLP assay. Upon *HindIII* digestion, a 1043 bp and a 916 bp product will be generated from alleles that have undergone HDR driven targeted integration of the *HindIII* site containing patch, whereas the full length 1953 bp PCR product will remain undigested from the wild-type allele. The percentage of *HindIII*-sensitive DNA (indicated by arrows) resulting from targeted integration is indicated below each lane.

**Supplementary Figure 6 (Fig.S6)**

**A.** Amino acid sequence of *CCR5* ZFN-L-EL:

1 MDYKDHDGDY KDHDIDYKDD DDKMAPKKKR KVGIHGVPAA MAERPFQCRI

51 CMRNFSDRSN LSRHIRTHTG EKPFACDICG RKFAISSNLN SHTKIHTGSQ

101 KPFQCRICMR NFSRSDNLAR HIRTHTGEKP FACDICGRKF ATSGNLTRHT

151 KIHLRGSQLV KSELEEKKSE LRHKLKYVPH EYIELIEIAR NSTQDRILEM

201 KVMEFFMKVY GYRGKHLGGS RKPDGAIYTV GSPIDYGVIV DTKAYSGGYN

251 LPIGQADEME RYVEENQTRN KHLNPNEWWK VYPSSVTEFK FLFVSGHFKG

301 NYKAQLTRLN HITNCNGAVL SVEELLIGGE MIKAGTLTLE EVRRKFNNGE

351 INF

**B.** Amino acid sequence of *CCR5* ZFN-L-EL D450N:

1 MDYKDHDGDY KDHDIDYKDD DDKMAPKKKR KVGIHGVPAA MAERPFQCRI

51 CMRNFSDRSN LSRHIRTHTG EKPFACDICG RKFAISSNLN SHTKIHTGSQ

101 KPFQCRICMR NFSRSDNLAR HIRTHTGEKP FACDICGRKF ATSGNLTRHT

151 KIHLRGSQLV KSELEEKKSE LRHKLKYVPH EYIELIEIAR NSTQDRILEM

201 KVMEFFMKVY GYRGKHLGGS RKP**N**GAIYTV GSPIDYGVIV DTKAYSGGYN

251 LPIGQADEME RYVEENQTRN KHLNPNEWWK VYPSSVTEFK FLFVSGHFKG

301 NYKAQLTRLN HITNCNGAVL SVEELLIGGE MIKAGTLTLE EVRRKFNNGE

351 INF

**C.** Amino acid sequence of *CCR5* ZFN-L-EL D467A:

1 MDYKDHDGDY KDHDIDYKDD DDKMAPKKKR KVGIHGVPAA MAERPFQCRI

51 CMRNFSDRSN LSRHIRTHTG EKPFACDICG RKFAISSNLN SHTKIHTGSQ

101 KPFQCRICMR NFSRSDNLAR HIRTHTGEKP FACDICGRKF ATSGNLTRHT

151 KIHLRGSQLV KSELEEKKSE LRHKLKYVPH EYIELIEIAR NSTQDRILEM

201 KVMEFFMKVY GYRGKHLGGS RKPDGAIYTV GSPIDYGVIV **A**TKAYSGGYN

251 LPIGQADEME RYVEENQTRN KHLNPNEWWK VYPSSVTEFK FLFVSGHFKG

301 NYKAQLTRLN HITNCNGAVL SVEELLIGGE MIKAGTLTLE EVRRKFNNGE

351 INF

**D.** Amino acid sequence of *CCR5* ZFN-R-KK:

1 MDYKDHDGDY KDHDIDYKDD DDKMAPKKKR KVGIHGVPAA MAERPFQCRI

51 CMRNFSRSDN LSVHIRTHTG EKPFACDICG RKFAQKINLQ VHTKIHTGEK

101 PFQCRICMRN FSRSDVLSEH IRTHTGEKPF ACDICGRKFA QRNHRTTHTK

151 IHLRGSQLVK SELEEKKSEL RHKLKYVPHE YIELIEIARN STQDRILEMK

201 VMEFFMKVYG YRGKHLGGSR KPDGAIYTVG SPIDYGVIVD TKAYSGGYNL

251 PIGQADEMQR YVKENQTRNK HINPNEWWKV YPSSVTEFKF LFVSGHFKGN

301 YKAQLTRLNH KTNCNGAVLS VEELLIGGEM IKAGTLTLEE VRRKFNNGEI

351 NF

**References**

Hockemeyer, D., Soldner, F., Beard, C., Gao, Q., Mitalipova, M., DeKelver, R.C., Katibah, G.E., Amora, R., Boydston, E.A., Zeitler, B. et al. 2009. Efficient targeting of expressed and silent genes in human ESCs and iPSCs using zinc-finger nucleases. *Nat Biotechnol* **27:** 851-857.

Kvikstad, E.M., Tyekucheva, S., Chiaromonte, F., and Makova, K.D. 2007. A macaque's-eye view of human insertions and deletions: differences in mechanisms. *PLoS Comput Biol* **3:** 1772-1782.

Russell, D.W. and Hirata, R.K. 2008. Human gene targeting favors insertions over deletions. *Hum Gene Ther* **19:** 907-914.
